# Supplementary material
Source: PubMed Central journal article supplement (PMC5137731)
Supplement: pnas.1511501113.sd03.pdf [file pnas.1511501113.sd03.pdf]

| id  | margin     | winnerloser | trustp1 | trustp2 | p2endowme | dictator |
|-----|------------|-------------|---------|---------|-----------|----------|
| 211 | -0.0327869 | 0           | 4       | NA      | NA        | NA       |
| 182 | 0.08351811 | 1           | 1       | 15      | 20        | 10       |
| 171 | 0.04892368 | 1           | 2       | 0       | 8         | 0        |
| 175 | 0.02587646 | 1           | 1       | 1       | 8         | 5        |
| 197 | 0.07255747 | 1           | 0       | NA      | NA        | NA       |
| 184 | 0.09079524 | 1           | 1       | 5       | 14        | 4        |
| 169 | -0.0551655 | 0           | 3       | 1       | 5         | 5        |
| 867 | 0.08170515 | 1           | 1       | NA      | 20        | 2        |
| 304 | -0.0845481 | 0           | 5       | 5       | 20        | 3        |
| 187 | 0.01416853 | 1           | 5       | NA      | 5         | 0        |
| 255 | 0.06367041 | 1           | 1       | 5       | 8         | NA       |
| 176 | 0.00696379 | 1           | 1       | 9       | 14        | NA       |
| 155 | -0.0751782 | 0           | 0       | 0       | 5         | 0        |
| 269 | 0.04366812 | 1           | 4       | 0       | 20        | 0        |
| 188 | -0.0069638 | 0           | 5       | 3       | 5         | 2        |
| 165 | 0.08785943 | 1           | 0       | 8       | 8         | 0        |
| 242 | 0.0385424  | 1           | 4       | 8       | 8         | 4        |
| 249 | 0.00743187 | 1           | 0       | NA      | 5         | 2        |
| 208 | 0.09054622 | 1           | 1       | NA      | NA        | NA       |
| 213 | 0.03278689 | 1           | 3       | NA      | NA        | NA       |
| 214 | -0.0511509 | 0           | 5       | NA      | NA        | NA       |
| 159 | -0.0746455 | 0           | 0       | 1       | 8         | 0        |
| 254 | 0.09665428 | 1           | 4       | 4       | 5         | NA       |
| 243 | -0.0215054 | 0           | 1       | 0       | 5         | 0        |
| 311 | -0.0380558 | 0           | 4       | 4       | 17        | 1        |
| 342 | -0.0436681 | 0           | 5       | 0.25    | 20        | 10       |
| 310 | 0.03805577 | 1           | 2       | 2       | 11        | 3        |
| 463 | -0.0916335 | 0           | 5       | 5       | 5         | 0        |
| 258 | 0.00678222 | 1           | 5       | 11      | 11        | 0        |
| 313 | -0.0723982 | 0           | NA      | 0       | 5         | 5        |
| 312 | 0.07239819 | 1           | 2       | 3       | 11        | NA       |
| 200 | -0.0092184 | 0           | 3       | NA      | NA        | NA       |
| 206 | 0.05145798 | 1           | 3       | NA      | NA        | NA       |
| 215 | -0.051458  | 0           | 5       | NA      | NA        | NA       |
| 170 | 0.0551655  | 1           | 0       | 1       | 8         | 4        |
| 172 | 0.04223676 | 1           | 4       | 3       | 8         | 3        |
| 185 | -0.0907952 | 0           | 5       | 3       | 14        | 4        |
| 301 | -0.0178535 | 0           | 1       | 3       | 8         | NA       |
| 153 | 0.07464554 | 1           | 4       | 5       | 11        | 2        |
| 158 | 0.05740181 | 1           | 5       | 5       | 8         | 4        |
| 151 | 0.00094429 | 1           | 1       | 14      | 14        | 0        |

|     |            |      |      |    |       |    |
|-----|------------|------|------|----|-------|----|
| 150 | 0.02917842 | 1    | 5    | 0  | 5     | 0  |
| 186 | -0.038961  | 0    | 4    | 0  | 5     | 3  |
| 222 | 0.06956522 | 1    | 1    | 0  | 5     | 1  |
| 246 | 0.06087138 | 1    | 0    | 0  | 5 NA  |    |
| 330 | -0.0239617 | 0    | 0    | 0  | 5     | 0  |
| 220 | -0.0128    | 0    | 4    | 1  | 8     | 6  |
| 267 | -0.0691489 | 0    | 1    | 1  | 8     | 6  |
| 157 | 0.08794198 | 1    | 1    | 2  | 8     | 2  |
| 183 | -0.0489237 | 0    | 1    | 4  | 5 NA  |    |
| 161 | 0.09667674 | 1    | 3    | 5  | 17    | 0  |
| 329 | 0.02396166 | 1    | 1    | 5  | 5     | 0  |
| 332 | 0.03916161 | 1    | 3    | 5  | 20    | 0  |
| 173 | 0.061734   | 1    | 3    | 7  | 17    | 0  |
| 164 | 0.05308392 | 1    | 0    | 14 | 14    | 0  |
| 302 | 0.01785348 | 1    | 5    | 15 | 20    | 20 |
| 195 | 0.06549521 | 1    | 0 NA | NA | NA    |    |
| 199 | -0.0654952 | 0    | 0 NA | NA | NA    |    |
| 203 | 0.05121294 | 1    | 0 NA | NA | NA    |    |
| 209 | -0.0066007 | 0    | 1 NA | NA | NA    |    |
| 326 | 0.04448938 | 1    | 1    | 3  | 5     | 3  |
| 257 | 0.07725632 | 1    | 2    | 4  | 17    | 8  |
| 256 | -0.0385424 | 0    | 5    | 5  | 20    | 0  |
| 248 | -0.0608714 | 0    | 0    | 0  | 5 NA  |    |
| 251 | 0.05909618 | 1    | 3    | 0  | 5 NA  |    |
| 306 | 0.07589286 | 1 NA |      | 0  | 5     | 0  |
| 247 | -0.0636704 | 0    | 0    | 1  | 5 NA  |    |
| 303 | 0.08454811 | 1    | 1    | 2  | 8     | 1  |
| 177 | -0.0203327 | 0    | 2    | 5  | 17 NA |    |
| 241 | -0.0067822 | 0    | 5    | 5  | 8     | 2  |
| 272 | 0.05851064 | 1    | 0    | 6  | 20    | 3  |
| 163 | 0.01637931 | 1    | 0    | 20 | 20    | 0  |
| 196 | 0.05882353 | 1    | 5 NA | NA | NA    |    |
| 201 | -0.0966767 | 0    | 0 NA | NA | NA    |    |
| 207 | -0.0806783 | 0    | 1 NA | NA | NA    |    |
| 221 | -0.0247326 | 0    | 3    | 1  | 14    | 6  |
| 223 | -0.0695652 | 0    | 4    | 6  | 20    | 17 |
| 216 | 0.03400885 | 1 NA | NA   | NA | NA    |    |
| 252 | -0.0966543 | 0    | 0    | 0  | 5     | 5  |
| 194 | -0.0340089 | 0    | 4    | 0  | 5     | 0  |
| 336 | 0.05902778 | 1    | 0    | 0  | 5     | 0  |
| 307 | 0.00434216 | 1    | 1    | 3  | 5     | 0  |
| 309 | -0.061287  | 0    | 3    | 3  | 14    | 2  |

|     |            |   |      |    |    |    |
|-----|------------|---|------|----|----|----|
| 262 | 0.00590842 | 1 | 4    | 5  | 5  | 5  |
| 181 | -0.0258765 | 0 | 4    | 5  | 5  | 0  |
| 167 | -0.0485194 | 0 | 1    | 7  | 17 | 6  |
| 265 | -0.0832861 | 0 | 5    | 8  | 8  | 0  |
| 156 | 0.04388229 | 1 | 4 NA |    | 17 | 0  |
| 331 | 0.08328612 | 1 | 2    | 0  | 5  | 0  |
| 202 | 0.07517822 | 1 | 1 NA | NA | NA |    |
| 210 | 0.04326757 | 1 | 1 NA | NA | NA |    |
| 305 | -0.0291784 | 0 | 0    | 0  | 5  | 0  |
| 271 | 0.01555412 | 1 | 5    | 1  | 5  | 0  |
| 308 | 0.07918848 | 1 | 1    | 3  | 8  | 2  |
| 467 | 0.06321113 | 1 | 2    | 3  | 5  | 2  |
| 335 | 0.03901311 | 1 | 0    | 5  | 5  | 0  |
| 346 | -0.0441176 | 0 | 1    | 5  | 20 | 0  |
| 160 | -0.0927059 | 0 | 3    | 6  | 20 | 0  |
| 868 | 0.04411765 | 1 | 5    | 11 | 11 | 11 |
| 328 | 0.01706485 | 1 | 0 NA |    | 8  | 0  |
| 219 | 0.0128     | 1 | 1    | 9  | 17 | 3  |
| 212 | -0.0094557 | 0 | 1 NA | NA | NA |    |
| 261 | -0.0163793 | 0 | 1    | 2  | 8  | 2  |
| 162 | 0.08067831 | 1 | 0    | 0  | 5  | 0  |
| 245 | 0.02150538 | 1 | 2    | 0  | 5  | 0  |
| 260 | 0.05988593 | 1 | 3    | 0  | 20 | 0  |
| 337 | -0.05919   | 0 | 1    | 0  | 8  | 2  |
| 351 | -0.0741858 | 0 | 5    | 0  | 5  | 0  |
| 466 | 0.01919123 | 1 | 1    | 0  | 5  | 0  |
| 333 | -0.0590278 | 0 | 5    | 1  | 8  | 2  |
| 168 | 0.09270588 | 1 | 1    | 3  | 14 | 6  |
| 461 | -0.0632111 | 0 | 0    | 5  | 20 | 0  |
| 217 | 0.05363985 | 1 | 0    | 5  | 20 | 1  |
| 323 | -0.0183784 | 0 | 0    | 0  | 14 | 4  |
| 218 | -0.0536398 | 0 | 5    | 2  | 8  | 5  |
| 198 | 0.00660066 | 1 | 0 NA | NA | NA |    |
| 270 | -0.0585106 | 0 | 2    | 0  | 14 | 0  |
| 180 | 0.02033272 | 1 | 0    | 1  | 17 | 0  |
| 347 | -0.0512129 | 0 | 0    | 1  | 5  | 0  |
| 334 | 0.03345725 | 1 | 2    | 2  | 8  | 2  |
| 264 | 0.00945566 | 1 | 0    | 3  | 11 | 0  |
| 268 | 0.0877551  | 1 | 1    | 3  | 17 | 4  |
| 343 | 0.04157187 | 1 | 0    | 5  | 20 | 10 |
| 348 | -0.0878594 | 0 | 5    | 5  | 17 | 8  |
| 263 | -0.0994318 | 0 | 1    | 20 | 20 | 0  |

|     |            |   |      |    |    |      |
|-----|------------|---|------|----|----|------|
| 327 | -0.0444894 | 0 | 0    | 0  | 5  | 2    |
| 204 | 0.0511509  | 1 | 0 NA | NA | NA |      |
| 244 | 0.09548964 | 1 | 1    | 0  | 5  | 0    |
| 250 | -0.0074319 | 0 | 5    | 0  | 5  | 0.05 |
| 339 | 0.01837838 | 1 | 0    | 0  | 5  | 0    |
| 344 | 0.00178944 | 1 | 4    | 1  | 5  | 1    |
| 178 | -0.0472078 | 0 | 2    | 2  | 8  | 2    |
| 179 | -0.0043422 | 0 | 4    | 3  | 5  | 0    |
| 266 | 0.06914894 | 1 | 2    | 3  | 8  | 2    |
| 464 | -0.0899094 | 0 | 1    | 3  | 8  | 0    |
| 324 | -0.0170648 | 0 | 5    | 15 | 20 | 2    |
| 345 | -0.0017894 | 0 | 5    | 15 | 20 | 5    |
| 325 | 0.05919003 | 1 | 1    | 0  | 11 | 0    |
| 338 | -0.0391616 | 0 | 0    | 0  | 5  | 0    |
| 468 | -0.0792079 | 0 | 0    | 0  | 20 | 0    |
| 462 | -0.0540726 | 0 | 5    | 2  | 8  | 1    |
| 465 | -0.0432676 | 0 | 0    | 4  | 11 | 4    |
| 349 | 0.03527981 | 1 | 5    | 10 | 20 | 5    |

| compliance | Bemba | Incumbent | Province | Gender | Age | Education |   |
|------------|-------|-----------|----------|--------|-----|-----------|---|
| 0.27777778 |       |           |          |        |     |           |   |
| 0.28571429 |       |           |          |        |     |           |   |
| 0.29411765 |       |           |          |        |     |           |   |
| 0.33333333 |       |           |          |        |     |           |   |
| 0.35714286 |       |           |          |        |     |           |   |
| 0.38095238 |       |           |          |        |     |           |   |
| 0.38095238 |       |           |          |        |     |           |   |
| 0.4        |       |           |          |        |     |           |   |
| 0.42857143 |       |           |          |        |     |           |   |
| 0.45       |       |           |          |        |     |           |   |
| 0.47058824 |       |           |          |        |     |           |   |
| 0.47619048 |       |           |          |        |     |           |   |
| 0.47619048 |       |           |          |        |     |           |   |
| 0.47619048 |       |           |          |        |     |           |   |
| 0.47619048 |       |           |          |        |     |           |   |
| 0.47619048 |       |           |          |        |     |           |   |
| 0.47619048 |       |           |          |        |     |           |   |
| 0.47619048 |       |           |          |        |     |           |   |
| 0.5        | 1     | 0         |          | 1      | 1   | 47        | 7 |
| 0.5        | 1     | 1         |          | 6      | 0   | 58        | 5 |
| 0.5        | 1     | 0         |          | 2      | 0   | 67        | 5 |
| 0.52380952 | 1     | 0         |          | 6      | 0   | 47        | 5 |
| 0.52380952 | 0     | 0         |          | 3      | 0   | 52        | 7 |
| 0.52380952 | 0     | 0         |          | 3      | 1   | 43        | 5 |
| 0.52380952 | 0     | 0         |          | 4      | 0   | 50        | 5 |
| 0.52941177 | 1     | 0         |          | 2 NA   | NA  | NA        |   |
| 0.57142857 | 0     | 0         |          | 4      | 0   | 37        | 4 |
| 0.57142857 | 1     | 1         |          | 7      | 0   | 72        | 4 |
| 0.57142857 | 0     | 0 NA      |          |        | 1   | 55        | 5 |
| 0.58823529 | 0     | 0         |          | 3      | 0   | 66        | 6 |
| 0.58823529 | 0     | 0         |          | 3      | 0   | 48        | 5 |
| 0.61111111 | 1     | 0         |          | 6      | 0   | 52        | 5 |
| 0.61111111 | 1     | 1         |          | 1      | 0   | 64        | 6 |
| 0.61111111 | 1     | 0         |          | 1      | 0   | 66        | 5 |
| 0.61904762 | 0     | 0         |          | 1      | 0   | 74        | 5 |
| 0.61904762 | 0     | 1         |          | 1      | 0   | 55        | 7 |
| 0.61904762 | 0     | 0         |          | 1      | 0   | 69        | 5 |
| 0.61904762 | 0     | 0         |          | 3      | 0   | 53        | 5 |
| 0.61904762 | 1     | 0         |          | 6      | 0   | 51        | 6 |
| 0.61904762 | 1     | 0         |          | 2      | 0   | 48        | 6 |
| 0.61904762 | 1     | 0         |          | 6      | 1   | 60        | 5 |

|            |   |   |   |   |    |   |
|------------|---|---|---|---|----|---|
| 0.66666667 | 1 | 0 | 4 | 0 | 59 | 6 |
| 0.66666667 | 0 | 0 | 8 | 0 | 67 | 5 |
| 0.66666667 | 0 | 0 | 8 | 0 | 52 | 6 |
| 0.66666667 | 0 | 0 | 3 | 0 | 39 | 5 |
| 0.66666667 | 1 | 0 | 7 | 0 | 32 | 6 |
| 0.66666667 | 0 | 0 | 9 | 0 | 63 | 6 |
| 0.66666667 | 1 | 0 | 2 | 0 | 62 | 6 |
| 0.66666667 | 1 | 0 | 2 | 0 | 51 | 7 |
| 0.66666667 | 0 | 0 | 8 | 0 | 53 | 7 |
| 0.66666667 | 1 | 0 | 2 | 0 | 57 | 5 |
| 0.66666667 | 1 | 0 | 7 | 0 | 60 | 5 |
| 0.66666667 | 1 | 0 | 4 | 0 | 70 | 4 |
| 0.66666667 | 0 | 0 | 8 | 1 | 52 | 5 |
| 0.66666667 | 1 | 0 | 2 | 0 | 39 | 5 |
| 0.66666667 | 0 | 1 | 4 | 0 | 32 | 7 |
| 0.66666667 | 1 | 0 | 6 | 0 | 35 | 7 |
| 0.66666667 | 1 | 0 | 6 | 0 | 51 | 7 |
| 0.66666667 | 1 | 0 | 2 | 0 | 47 | 7 |
| 0.66666667 | 1 | 0 | 6 | 0 | 61 | 5 |
| 0.70588235 | 1 | 0 | 7 | 0 | 52 | 5 |
| 0.71428571 | 0 | 0 | 3 | 0 | 40 | 6 |
| 0.71428571 | 0 | 1 | 3 | 1 | 42 | 5 |
| 0.71428571 | 0 | 1 | 3 | 0 | 74 | 5 |
| 0.71428571 | 0 | 0 | 3 | 0 | 38 | 5 |
| 0.71428571 | 0 | 0 | 4 | 0 | 38 | 6 |
| 0.71428571 | 0 | 0 | 3 | 0 | 50 | 6 |
| 0.71428571 | 0 | 0 | 4 | 0 | 34 | 5 |
| 0.71428571 | 0 | 0 | 8 | 0 | 43 | 6 |
| 0.71428571 | 0 | 0 | 3 | 0 | 50 | 6 |
| 0.71428571 | 1 | 0 | 2 | 1 | 41 | 7 |
| 0.71428571 | 1 | 0 | 2 | 0 | 46 | 5 |
| 0.72222222 | 1 | 0 | 6 | 0 | 53 | 5 |
| 0.72222222 | 1 | 1 | 2 | 0 | 59 | 7 |
| 0.72222222 | 1 | 0 | 2 | 0 | 46 | 5 |
| 0.72727273 | 0 | 0 | 9 | 0 | 49 | 5 |
| 0.73333333 | 0 | 0 | 8 | 0 | 60 | 7 |
| 0.75       | 1 | 0 | 1 | 0 | 48 | 6 |
| 0.76190476 | 0 | 0 | 3 | 0 | 39 | 7 |
| 0.76190476 | 1 | 0 | 1 | 0 | 58 | 8 |
| 0.76190476 | 1 | 1 | 7 | 0 | 41 | 7 |
| 0.76190476 | 0 | 0 | 4 | 0 | 59 | 8 |
| 0.76190476 | 0 | 0 | 8 | 0 | 47 | 6 |

|            |   |   |   |   |    |   |
|------------|---|---|---|---|----|---|
| 0.76190476 | 1 | 0 | 6 | 0 | 47 | 5 |
| 0.76190476 | 0 | 0 | 8 | 0 | 34 | 5 |
| 0.76190476 | 1 | 0 | 2 | 0 | 51 | 7 |
| 0.76190476 | 1 | 1 | 2 | 0 | 50 | 6 |
| 0.76190476 | 1 | 0 | 6 | 0 | 41 | 6 |
| 0.76470588 | 1 | 0 | 2 | 0 | 72 | 6 |
| 0.77777778 | 1 | 0 | 2 | 1 | 55 | 7 |
| 0.77777778 | 1 | 0 | 6 | 0 | 51 | 7 |
| 0.80952381 | 0 | 0 | 4 | 0 | 34 | 6 |
| 0.80952381 | 1 | 0 | 2 | 0 | 70 | 7 |
| 0.80952381 | 0 | 0 | 4 | 0 | 36 | 6 |
| 0.80952381 | 1 | 0 | 7 | 0 | 35 | 5 |
| 0.80952381 | 1 | 0 | 7 | 0 | 38 | 6 |
| 0.80952381 | 1 | 0 | 2 | 0 | 53 | 7 |
| 0.80952381 | 1 | 0 | 6 | 0 | 34 | 5 |
| 0.80952381 | 1 | 0 | 2 | 0 | 46 | 5 |
| 0.8125     | 1 | 1 | 7 | 0 | 52 | 5 |
| 0.82352941 | 0 | 0 | 8 | 0 | 40 | 6 |
| 0.83333333 | 1 | 0 | 1 | 0 | 47 | 5 |
| 0.85714286 | 1 | 0 | 2 | 1 | 57 | 7 |
| 0.85714286 | 1 | 0 | 2 | 0 | 51 | 7 |
| 0.85714286 | 0 | 0 | 3 | 0 | 32 | 6 |
| 0.85714286 | 0 | 1 | 3 | 0 | 46 | 3 |
| 0.85714286 | 1 | 1 | 7 | 0 | 38 | 6 |
| 0.85714286 | 1 | 0 | 2 | 0 | 62 | 6 |
| 0.85714286 | 1 | 0 | 5 | 0 | 61 | 7 |
| 0.85714286 | 1 | 0 | 7 | 0 | 45 | 5 |
| 0.85714286 | 1 | 0 | 6 | 0 | 47 | 7 |
| 0.85714286 | 1 | 0 | 7 | 1 | 34 | 7 |
| 0.86666667 | 0 | 0 | 9 | 0 | 38 | 9 |
| 0.88235294 | 1 | 0 | 7 | 0 | 42 | 5 |
| 0.88235294 | 0 | 0 | 9 | 0 | 50 | 9 |
| 0.88888889 | 1 | 0 | 6 | 0 | 44 | 6 |
| 0.90476191 | 1 | 0 | 2 | 0 | 65 | 7 |
| 0.90476191 | 0 | 1 | 8 | 0 | 38 | 6 |
| 0.90476191 | 1 | 1 | 2 | 0 | 47 | 7 |
| 0.90476191 | 1 | 0 | 7 | 0 | 42 | 5 |
| 0.90476191 | 1 | 0 | 1 | 0 | 51 | 5 |
| 0.90476191 | 1 | 0 | 2 | 0 | 46 | 6 |
| 0.90476191 | 1 | 0 | 2 | 0 | 41 | 6 |
| 0.90476191 | 1 | 0 | 2 | 0 | 40 | 9 |
| 0.90476191 | 1 | 0 | 6 | 0 | 48 | 5 |

|            |   |      |   |   |    |   |
|------------|---|------|---|---|----|---|
| 0.94117647 | 1 | 1    | 7 | 0 | 36 | 7 |
| 0.94444444 | 1 | 0    | 2 | 0 | 55 | 6 |
| 0.95238095 | 0 | 0    | 3 | 0 | 54 | 5 |
| 0.95238095 | 0 | 0    | 3 | 0 | 36 | 5 |
| 0.95238095 | 1 | 1    | 7 | 0 | 32 | 6 |
| 0.95238095 | 1 | 0    | 2 | 0 | 25 | 9 |
| 0.95238095 | 0 | 0    | 8 | 0 | 39 | 6 |
| 0.95238095 | 0 | 0    | 4 | 0 | 55 | 6 |
| 0.95238095 | 1 | 0    | 2 | 0 | 43 | 5 |
| 0.95238095 | 1 | 0    | 5 | 0 | 37 | 6 |
| 0.95238095 | 1 | 0 NA |   | 0 | 58 | 5 |
| 0.95238095 | 1 | 0    | 2 | 0 | 63 | 6 |
| 1          | 1 | 0    | 7 | 0 | 42 | 5 |
| 1          | 1 | 0    | 4 | 0 | 51 | 5 |
| 1          | 1 | 0    | 2 | 0 | 47 | 6 |
| 1          | 1 | 0    | 5 | 0 | 32 | 6 |
| 1          | 1 | 0    | 6 | 1 | 46 | 7 |
| 1          | 1 | 0    | 2 | 0 | 54 | 9 |



Income Business House Car MMD

|    |    |    |      |      |   |
|----|----|----|------|------|---|
|    | 8  | 1  | 1    | 0    | 0 |
|    | 3  | 1  | 1    | 0    | 1 |
|    | 5  | 1  | 1    | 0    | 0 |
|    | 3  | 1  | 1 NA |      | 1 |
|    | 5  | 1  | 1    | 0    | 0 |
| NA |    | 0  | 1    | 0    | 1 |
|    | 5  | 0  | 0    | 0    | 1 |
| NA |    | 0  | 0    | 0 NA |   |
|    | 15 | 1  | 1    | 1    | 0 |
|    | 7  | 1  | 1    | 0    | 0 |
|    | 4  | 0  | 1    | 0    | 1 |
| NA |    | 0  | 1    | 0    | 0 |
| NA |    | 0  | 1    | 0    | 1 |
|    | 3  | 0  | 1    | 0    | 1 |
|    | 3  | 0  | 0    | 0    | 1 |
|    | 5  | 0  | 1    | 0    | 0 |
| NA | NA | NA |      | 1    | 0 |
|    | 6  | 1  | 1    | 1    | 1 |
|    | 2  | 0  | 1    | 0    | 1 |
|    | 5  | 1  | 1    | 1    | 0 |
|    | 9  | 1  | 1    | 1    | 0 |
|    | 3  | 1  | 1    | 0    | 0 |
| NA |    | 0  | 1    | 0    | 1 |

|    |    |      |      |   |   |
|----|----|------|------|---|---|
|    | 4  | 1    | 1    | 0 | 0 |
|    | 3  | 0    | 1    | 0 | 1 |
|    | 5  | 1    | 1    | 0 | 1 |
|    | 3  | 1    | 1    | 0 | 1 |
|    | 2  | 0    | 1    | 0 | 0 |
|    | 7  | 1    | 1    | 1 | 0 |
|    | 3  | 1    | 1    | 0 | 0 |
|    | 7  | 1    | 1    | 1 | 0 |
|    | 5  | 1    | 1    | 0 | 0 |
|    | 4  | 1    | 1    | 1 | 0 |
|    | 4  | 1    | 1    | 0 | 0 |
|    | 4  | 1    | 1    | 0 | 1 |
|    | 15 | 1    | 1    | 1 | 1 |
|    | 7  | 0    | 0    | 0 | 0 |
| NA |    | 1    | 1    | 1 | 0 |
|    | 5  | 1    | 0    | 0 | 0 |
|    | 4  | 1    | 1    | 0 | 1 |
|    | 7  | 1    | 1    | 1 | 0 |
|    | 4  | 1    | 1    | 0 | 1 |
|    | 14 | 1    | 1    | 0 | 0 |
|    | 2  | 1    | 1    | 0 | 1 |
|    | 1  | 1    | 1    | 0 | 0 |
|    | 2  | 0    | 1    | 0 | 0 |
| NA |    | 0    | 1    | 0 | 0 |
|    | 2  | 0    | 1    | 0 | 0 |
|    | 4  | 1    | 1    | 0 | 1 |
|    | 2  | 0    | 1 NA |   | 1 |
|    | 4  | 1    | 1    | 0 | 0 |
|    | 3  | 1    | 1    | 0 | 1 |
|    | 10 | 1    | 1    | 1 | 1 |
|    | 6  | 0    | 1    | 0 | 1 |
|    | 1  | 0    | 1    | 0 | 0 |
|    | 3  | 0    | 1    | 0 | 1 |
|    | 3  | 1    | 1    | 0 | 0 |
|    | 1  | 1    | 1    | 0 | 0 |
|    | 4  | 1    | 1    | 0 | 0 |
|    | 9  | 1    | 1    | 1 | 1 |
|    | 7  | 0 NA |      | 1 | 1 |
|    | 7  | 1    | 1    | 0 | 0 |
|    | 6  | 1    | 1    | 0 | 0 |
|    | 6  | 0    | 1    | 1 | 1 |
|    | 7  | 0    | 1    | 0 | 1 |

|    |    |   |      |   |   |
|----|----|---|------|---|---|
|    | 3  | 0 | 1    | 0 | 1 |
|    | 4  | 1 | 1    | 0 | 0 |
|    | 7  | 1 | 1    | 0 | 0 |
|    | 15 | 1 | 1    | 0 | 1 |
|    | 5  | 1 | 1    | 0 | 1 |
|    | 3  | 1 | 1 NA |   | 0 |
|    | 4  | 1 | 1    | 0 | 0 |
|    | 3  | 0 | 1    | 0 | 0 |
|    | 7  | 1 | 1    | 0 | 0 |
|    | 5  | 1 | 1    | 0 | 1 |
|    | 9  | 1 | 1    | 1 | 1 |
| NA |    | 0 | 1    | 0 | 1 |
|    | 6  | 1 | 1    | 1 | 1 |
|    | 4  | 1 | 1    | 0 | 0 |
|    | 1  | 0 | 1    | 0 | 1 |
|    | 4  | 1 | 1    | 1 | 1 |
| NA |    | 0 | 1    | 0 | 1 |
|    | 9  | 1 | 1    | 1 | 1 |
|    | 5  | 1 | 1    | 0 | 0 |
|    | 6  | 1 | 1    | 0 | 1 |
|    | 6  | 1 | 1    | 1 | 1 |
|    | 3  | 0 | 1    | 0 | 0 |
|    | 4  | 0 | 1    | 0 | 0 |
|    | 2  | 1 | 1    | 0 | 1 |
|    | 4  | 1 | 1    | 0 | 0 |
|    | 3  | 0 | 1    | 0 | 0 |
|    | 4  | 1 | 1    | 0 | 1 |
|    | 5  | 1 | 1    | 0 | 0 |
|    | 3  | 1 | 1    | 0 | 0 |
|    | 6  | 1 | 1    | 0 | 1 |
|    | 4  | 1 | 1    | 0 | 0 |
|    | 7  | 1 | 1    | 1 | 0 |
|    | 5  | 1 | 1    | 0 | 0 |
|    | 2  | 1 | 0    | 0 | 0 |
|    | 4  | 1 | 1    | 1 | 1 |
|    | 7  | 1 | 1    | 0 | 0 |
|    | 7  | 0 | 1    | 1 | 0 |
|    | 4  | 1 | 1    | 0 | 1 |
|    | 6  | 1 | 1    | 1 | 1 |
|    | 5  | 1 | 0    | 0 | 0 |
|    | 10 | 1 | 1    | 1 | 1 |
|    | 2  | 1 | 1    | 0 | 0 |

|    |   |   |   |   |   |
|----|---|---|---|---|---|
|    | 3 | 1 | 1 | 0 | 1 |
|    | 5 | 0 | 1 | 0 | 1 |
|    | 5 | 0 | 1 | 0 | 1 |
| NA |   | 0 | 1 | 0 | 1 |
|    | 3 | 0 | 1 | 0 | 1 |
|    | 7 | 1 | 0 | 0 | 0 |
|    | 5 | 1 | 1 | 0 | 1 |
|    | 8 | 1 | 1 | 1 | 0 |
|    | 3 | 1 | 1 | 1 | 1 |
|    | 5 | 1 | 0 | 0 | 1 |
|    | 1 | 1 | 1 | 1 | 1 |
|    | 4 | 0 | 1 | 1 | 0 |
|    | 2 | 1 | 1 | 0 | 0 |
|    | 1 | 0 | 1 | 0 | 0 |
|    | 7 | 1 | 1 | 1 | 0 |
|    | 4 | 1 | 1 | 0 | 0 |
|    | 7 | 1 | 1 | 1 | 1 |
|    | 7 | 1 | 1 | 1 | 1 |
