# Supplementary material
Source: PubMed Central journal article supplement (PMC5137731)
Supplement: pnas.1511501113.sd04.pdf [file pnas.1511501113.sd04.pdf]

| ID  | Placement | Bemba | Language | Incumbent | Province | Gender |   |
|-----|-----------|-------|----------|-----------|----------|--------|---|
| 216 | 1         | 1     | 1        | 1         | 0        | 1      | 0 |
| 211 | 0         | 1     | 1        | 1         | 0        | 6      | 0 |
| 197 | 1         | 1     | 1        | 1         | 0        | 1      | 0 |
| 255 | 1         | 0     | 4        | 4         | 0        | 3      |   |
| 176 | 1         | 0     | 2        | 2         | 0        | 8      | 0 |
| 196 | 1         | 1     | 1        | 1         | 0        | 6      | 0 |
| 201 | 0         | 1     | 1        | 1         | 1        | 2      | 0 |
| 246 | 1         | 0     | 4        | 4         | 0        | 3      | 0 |
| 210 | 1         | 1     | 1        | 1         | 0        | 6      | 0 |
| 200 | 0         | 1     | 1        | 1         | 0        | 6      | 0 |
| 213 | 1         | 1     | 1        | 1         | 1        | 6      | 0 |
| 247 | 0         | 0     | 4        | 4         | 0        | 3      | 0 |
| 199 | 0         | 1     | 1        | 1         | 0        | 6      | 0 |
| 202 | 1         | 1     | 1        | 1         | 0        | 2      | 1 |
| 209 | 0         | 1     | 1        | 1         | 0        | 6      | 0 |
| 177 | 0         | 0     | 2        | 2         | 0        | 8      | 0 |
| 204 | 1         | 1     | 1        | 1         | 0        | 2      | 0 |
| 198 | 1         | 1     | 1        | 1         | 0        | 6      | 0 |
| 195 | 1         | 1     | 1        | 1         | 0        | 6      | 0 |
| 212 | 0         | 1     | 1        | 1         | 0        | 1      | 0 |
| 183 | 0         | 0     | 2        | 2         | 0        | 8      | 0 |
| 301 | 0         | 0     | 4        | 4         | 0        | 3      | 0 |
| 254 | 1         | 0     | 4        | 4         | 0        | 3      | 0 |
| 214 | 0         | 1     | 1        | 1         | 0        | 2      | 0 |
| 203 | 1         | 1     | 1        | 1         | 0        | 2      | 0 |
| 328 | 1         | 1     | 1        | 1         | 1        | 7      | 0 |
| 312 | 1         | 0     | 4        | 4         | 0        | 3      | 0 |
| 306 | 1         | 0     | 4        | 4         | 0        | 4      | 0 |
| 313 | 0         | 0     | 4        | 4         | 0        | 3      | 0 |
| 188 | 0         | 0     | 2        | 2         | 0        | 8      | 0 |
| 249 | 1         | 0     | 4        | 4         | 0        | 3      | 0 |
| 175 | 1         | 0     | 2        | 2         | 0        | 8      | 0 |
| 304 | 0         | 0     | 4        | 4         | 0        | 4      | 0 |
| 155 | 0         | 1     | 1        | 1         | 1        |        | 1 |
| 184 | 1         | 0     | 2        | 2         | 1        | 1      | 0 |
| 269 | 1         | 1     | 1        | 1         | 0        | 2      | 0 |
| 169 | 0         | 0     | 2        | 2         | 0        | 1      | 1 |
| 165 | 1         | 1     | 1        | 1         | 0        | 2      | 0 |
| 338 | 0         | 1     | 1        | 1         | 0        | 4      | 0 |
| 160 | 0         | 1     | 1        | 1         | 0        | 6      | 0 |
| 221 | 0         | 0     | 3        | 3         | 0        | 9      | 0 |

|     |   |   |   |   |   |   |
|-----|---|---|---|---|---|---|
| 256 | 0 | 0 | 4 | 1 | 3 | 1 |
| 324 | 0 | 1 | 1 | 0 |   | 0 |
| 330 | 0 | 1 | 1 | 0 | 7 | 0 |
| 263 | 0 | 1 | 1 | 0 | 6 | 0 |
| 325 | 1 | 1 | 1 | 0 | 7 | 0 |
| 303 | 1 | 0 | 4 | 0 | 4 | 0 |
| 270 | 0 | 1 | 1 | 0 | 2 | 0 |
| 257 | 1 | 0 | 4 | 0 | 3 | 0 |
| 461 | 0 | 1 | 1 | 0 | 7 | 1 |
| 159 | 0 | 1 | 1 | 0 | 6 | 0 |
| 327 | 0 | 1 | 1 | 1 | 7 | 0 |
| 466 | 1 | 1 | 1 | 0 | 5 | 0 |
| 245 | 1 | 0 | 4 | 0 | 3 | 0 |
| 331 | 1 | 1 | 1 | 0 | 2 | 0 |
| 266 | 1 | 1 | 1 | 0 | 2 | 0 |
| 186 | 0 | 0 | 2 | 0 | 8 | 0 |
| 262 | 1 | 1 | 1 | 0 | 6 | 0 |
| 241 | 0 | 0 | 4 | 0 | 3 | 0 |
| 158 | 1 | 1 | 1 | 0 | 2 | 0 |
| 264 | 1 | 1 | 1 | 0 | 1 | 0 |
| 180 | 1 | 0 | 2 | 1 | 8 | 0 |
| 323 | 0 | 1 | 1 | 0 | 7 | 0 |
| 346 | 0 | 1 | 1 | 0 | 2 | 0 |
| 329 | 1 | 1 | 1 | 0 | 7 | 0 |
| 161 | 1 | 1 | 1 | 0 | 2 | 0 |
| 181 | 0 | 0 | 2 | 0 | 8 | 0 |
| 223 | 0 | 0 | 3 | 0 | 8 | 0 |
| 351 | 0 | 1 | 1 | 0 | 2 | 0 |
| 150 | 1 | 1 | 1 | 0 | 4 | 0 |
| 258 | 1 | 0 | 4 | 0 |   | 1 |
| 462 | 0 | 1 | 1 | 0 | 5 | 0 |
| 345 | 0 | 1 | 1 | 0 | 2 | 0 |
| 343 | 1 | 1 | 1 | 0 | 2 | 0 |
| 244 | 1 | 0 | 4 | 0 | 3 | 0 |
| 464 | 0 | 1 | 1 | 0 | 5 | 0 |
| 222 | 1 | 0 | 3 | 0 | 8 | 0 |
| 178 | 0 | 0 | 2 | 0 | 8 | 0 |
| 156 | 1 | 1 | 1 | 0 | 6 | 0 |
| 311 | 0 | 0 | 4 | 0 | 4 | 0 |
| 271 | 1 | 1 | 1 | 0 | 2 | 0 |
| 163 | 1 | 1 | 1 | 0 | 2 | 0 |
| 162 | 1 | 1 | 1 | 0 | 2 | 0 |

|     |   |   |   |   |   |   |
|-----|---|---|---|---|---|---|
| 335 | 1 | 1 | 1 | 0 | 7 | 0 |
| 217 | 1 | 0 | 3 | 0 | 9 | 0 |
| 307 | 1 | 0 | 4 | 0 | 4 | 0 |
| 261 | 0 | 1 | 1 | 0 | 2 | 1 |
| 172 | 1 | 0 | 2 | 1 | 1 | 0 |
| 164 | 1 | 1 | 1 | 0 | 2 | 0 |
| 347 | 0 | 1 | 1 | 1 | 2 | 0 |
| 468 | 0 | 1 | 1 | 0 | 2 | 0 |
| 252 | 0 | 0 | 4 | 0 | 3 | 0 |
| 157 | 1 | 1 | 1 | 0 | 2 | 0 |
| 167 | 0 | 1 | 1 | 0 | 2 | 0 |
| 334 | 1 | 1 | 1 | 0 | 7 | 0 |
| 309 | 0 | 0 | 4 | 0 | 8 | 0 |
| 194 | 0 | 1 | 1 | 0 | 1 | 0 |
| 344 | 1 | 1 | 1 | 0 | 2 | 0 |
| 220 | 0 | 0 | 3 | 0 | 9 | 0 |
| 463 | 0 | 1 | 1 | 1 | 7 | 0 |
| 349 | 1 | 1 | 1 | 0 | 2 | 0 |
| 179 | 0 | 0 | 2 | 0 | 4 | 0 |
| 308 | 1 | 0 | 4 | 0 | 4 | 0 |
| 219 | 1 | 0 | 3 | 0 | 8 | 0 |
| 153 | 1 | 1 | 1 | 0 | 6 | 0 |
| 272 | 1 | 1 | 1 | 0 | 2 | 1 |
| 348 | 0 | 1 | 1 | 0 | 2 | 0 |
| 326 | 1 | 1 | 1 | 0 | 7 | 0 |
| 310 | 1 | 0 | 4 | 0 | 4 | 0 |
| 173 | 1 | 0 | 2 | 0 | 8 | 1 |
| 265 | 0 | 1 | 1 | 1 | 2 | 0 |
| 170 | 1 | 0 | 2 | 0 | 1 | 0 |
| 243 | 0 | 0 | 4 | 0 | 3 | 1 |
| 151 | 1 | 1 | 1 | 0 | 6 | 1 |
| 467 | 1 | 1 | 1 | 0 | 7 | 0 |
| 250 | 0 | 0 | 4 | 0 | 3 | 0 |
| 342 | 0 | 1 | 1 | 0 | 2 |   |
| 302 | 1 | 0 | 4 | 1 | 4 | 0 |
| 187 | 1 | 0 | 2 | 0 | 8 | 0 |
| 248 | 0 | 0 | 4 | 1 | 3 | 0 |
| 207 | 0 | 1 | 1 | 0 | 2 | 0 |
| 206 | 1 | 1 | 1 | 1 | 1 | 0 |
| 215 | 0 | 1 | 1 | 0 | 1 | 0 |
| 208 | 1 | 1 | 1 | 0 | 1 | 1 |
| 171 | 1 | 0 | 2 | 1 |   | 0 |

|     |   |   |   |   |   |   |
|-----|---|---|---|---|---|---|
| 242 | 1 | 0 | 4 | 0 | 3 | 1 |
| 182 | 1 | 0 | 2 | 0 | 1 | 0 |
| 337 | 0 | 1 | 1 | 1 | 7 | 0 |
| 185 | 0 | 0 | 2 | 0 | 1 | 0 |
| 339 | 1 | 1 | 1 | 1 | 7 | 0 |
| 260 | 1 | 0 | 4 | 1 | 3 | 0 |
| 332 | 1 | 1 | 1 | 0 | 4 | 0 |
| 333 | 0 | 1 | 1 | 0 | 7 | 0 |
| 168 | 1 | 1 | 1 | 0 | 6 | 0 |
| 336 | 1 | 1 | 1 | 1 | 7 | 0 |
| 305 | 0 | 0 | 4 | 0 | 4 | 0 |
| 465 | 0 | 1 | 1 | 0 | 6 | 1 |
| 218 | 0 | 0 | 3 | 0 | 9 | 0 |
| 251 | 1 | 0 | 4 | 0 | 3 | 0 |
| 867 | 1 | 1 | 1 | 0 | 2 | 1 |
| 267 | 0 | 1 | 1 | 0 | 2 | 0 |
| 868 | 1 | 1 | 1 | 0 | 2 | 0 |
| 268 | 1 | 1 | 1 | 0 | 2 | 0 |

| Age | Education | Income | Business | House | Car | TV |   |
|-----|-----------|--------|----------|-------|-----|----|---|
| 48  | 6         | 9      | 1        | 1     | 1   | 1  | 1 |
| 64  | 7         | 2      | 0        | 0     | 1   | 0  | 0 |
| 68  | 4         | 3      | 1        | 1     | 1   | 0  | 1 |
| 56  | 4         |        | 1        | 1     | 1   | 0  | 0 |
| 62  | 5         |        | 0        | 1     | 1   | 0  | 0 |
| 53  | 5         | 1      | 0        | 1     | 1   | 0  | 0 |
| 59  | 7         | 3      | 0        | 1     | 1   | 0  | 1 |
| 39  | 5         | 3      | 1        | 1     | 1   | 0  | 0 |
| 51  | 7         | 3      | 0        | 1     | 1   | 0  | 1 |
| 52  | 5         | 3      | 0        | 1     | 1   | 0  | 1 |
| 58  | 5         | 3      | 1        | 1     | 1   | 0  | 1 |
| 50  | 6         | 4      | 1        | 1     | 1   | 0  | 0 |
| 51  | 7         | 4      | 1        | 1     | 1   | 0  | 0 |
| 55  | 7         | 4      | 1        | 1     | 1   | 0  | 1 |
| 61  | 5         | 4      | 1        | 1     | 1   | 0  | 1 |
| 43  | 6         | 4      | 1        | 1     | 1   | 0  | 0 |
| 55  | 6         | 5      | 0        | 1     | 1   | 0  | 1 |
| 44  | 6         | 5      | 1        | 1     | 1   | 0  | 1 |
| 35  | 7         | 5      | 1        | 1     | 0   | 0  | 1 |
| 47  | 5         | 5      | 1        | 1     | 1   | 0  | 1 |
| 53  | 7         | 5      | 1        | 1     | 1   | 0  | 1 |
| 53  | 5         | 5      | 1        | 1     | 1   | 1  | 1 |
| 52  | 7         | 5      | 1        | 1     | 1   | 0  | 1 |
| 67  | 5         | 5      | 1        | 1     | 1   | 0  | 1 |
| 47  | 7         | 7      | 1        | 1     | 1   | 1  | 1 |
| 52  | 5         |        | 0        | 1     | 1   | 0  | 1 |
| 48  | 5         |        | 0        | 1     | 1   | 0  | 0 |
| 38  | 6         | 2      | 0        | 1     | 1   | 0  | 1 |
| 66  | 6         |        | 0        | 1     | 1   | 0  | 0 |
| 42  | 5         | 1      | 0        | 1     | 1   | 0  | 1 |
| 44  | 5         | 2      | 1        | 1     | 1   | 0  | 1 |
| 54  | 1         | 2      | 1        | 1     | 1   | 0  | 0 |
| 38  | 6         | 2      | 0        | 1     | 1   | 0  | 0 |
| 59  | 5         | 3      | 1        | 1     | 1   | 0  | 1 |
| 61  | 7         | 4      | 0        | 1     | 1   | 0  | 1 |
| 61  | 5         | 4      | 1        | 1     | 1   | 1  | 1 |
| 46  | 5         | 5      | 0        | 0     | 0   | 0  | 1 |
| 52  | 9         | 7      | 1        | 1     | 1   | 1  | 1 |
| 51  | 5         | 1      | 0        | 1     | 1   | 0  | 1 |
| 34  | 5         | 1      | 0        | 1     | 1   | 0  | 0 |
| 49  | 5         | 1      | 1        | 1     | 1   | 0  | 0 |

|    |   |   |   |   |   |   |
|----|---|---|---|---|---|---|
| 42 | 5 | 1 | 1 | 1 | 0 | 0 |
| 58 | 5 | 1 | 1 | 1 | 1 | 1 |
| 32 | 6 | 2 | 0 | 1 | 0 | 0 |
| 48 | 5 | 2 | 1 | 1 | 0 | 0 |
| 42 | 5 | 2 | 1 | 1 | 0 | 0 |
| 34 | 5 | 2 | 0 | 1 |   | 1 |
| 65 | 7 | 2 | 1 | 0 | 0 | 1 |
| 40 | 6 | 2 | 1 | 1 | 0 | 1 |
| 34 | 7 | 3 | 1 | 1 | 0 | 0 |
| 47 | 5 | 3 | 1 | 1 |   | 0 |
| 36 | 7 | 3 | 1 | 1 | 0 | 0 |
| 61 | 7 | 3 | 0 | 1 | 0 | 0 |
| 32 | 6 | 3 | 0 | 1 | 0 | 1 |
| 72 | 6 | 3 | 1 | 1 |   | 1 |
| 43 | 5 | 3 | 1 | 1 | 1 | 1 |
| 67 | 5 | 3 | 0 | 1 | 0 | 0 |
| 47 | 5 | 3 | 0 | 1 | 0 | 0 |
| 50 | 6 | 3 | 1 | 1 | 0 | 0 |
| 48 | 6 | 3 | 1 | 1 | 0 | 1 |
| 51 | 5 | 4 | 1 | 1 | 0 | 1 |
| 38 | 6 | 4 | 1 | 1 | 1 | 1 |
| 42 | 5 | 4 | 1 | 1 | 0 | 0 |
| 53 | 7 | 4 | 1 | 1 | 0 | 1 |
| 60 | 5 | 4 | 1 | 1 | 0 | 0 |
| 57 | 5 | 4 | 1 | 1 | 1 | 1 |
| 34 | 5 | 4 | 1 | 1 | 0 | 1 |
| 60 | 7 | 4 | 1 | 1 | 0 | 0 |
| 62 | 6 | 4 | 1 | 1 | 0 | 1 |
| 59 | 6 | 4 | 1 | 1 | 0 | 1 |
| 55 | 5 | 4 | 0 | 1 | 0 | 1 |
| 32 | 6 | 4 | 1 | 1 | 0 | 0 |
| 63 | 6 | 4 | 0 | 1 | 1 | 1 |
| 41 | 6 | 5 | 1 | 0 | 0 | 1 |
| 54 | 5 | 5 | 0 | 1 | 0 | 0 |
| 37 | 6 | 5 | 1 | 0 | 0 | 1 |
| 52 | 6 | 5 | 1 | 1 | 0 | 0 |
| 39 | 6 | 5 | 1 | 1 | 0 | 1 |
| 41 | 6 | 5 | 1 | 1 | 0 | 1 |
| 50 | 5 | 5 | 0 | 0 | 0 | 1 |
| 70 | 7 | 5 | 1 | 1 | 0 | 1 |
| 46 | 5 | 6 | 0 | 1 | 0 | 1 |
| 51 | 7 | 6 | 1 | 1 | 1 | 1 |

|    |   |    |   |   |   |   |
|----|---|----|---|---|---|---|
| 38 | 6 | 6  | 1 | 1 | 1 | 1 |
| 38 | 9 | 6  | 1 | 1 | 0 | 1 |
| 59 | 8 | 6  | 0 | 1 | 1 | 1 |
| 57 | 7 | 6  | 1 | 1 | 0 | 1 |
| 55 | 7 | 6  | 1 | 1 | 1 | 1 |
| 39 | 5 | 7  | 0 | 0 | 0 | 1 |
| 47 | 7 | 7  | 1 | 1 | 0 | 1 |
| 47 | 6 | 7  | 1 | 1 | 1 | 1 |
| 39 | 7 | 7  | 0 |   | 1 | 1 |
| 51 | 7 | 7  | 1 | 1 | 1 | 1 |
| 51 | 7 | 7  | 1 | 1 | 0 | 1 |
| 42 | 5 | 7  | 0 | 1 | 1 | 1 |
| 47 | 6 | 7  | 0 | 1 | 0 | 1 |
| 58 | 8 | 7  | 1 | 1 | 0 | 1 |
| 25 | 9 | 7  | 1 | 0 | 0 | 1 |
| 63 | 6 | 7  | 1 | 1 | 1 | 1 |
| 72 | 4 | 7  | 1 | 1 | 0 | 1 |
| 54 | 9 | 7  | 1 | 1 | 1 | 1 |
| 55 | 6 | 8  | 1 | 1 | 1 | 1 |
| 36 | 6 | 9  | 1 | 1 | 1 | 1 |
| 40 | 6 | 9  | 1 | 1 | 1 | 1 |
| 51 | 6 | 9  | 1 | 1 | 1 | 1 |
| 41 | 7 | 10 | 1 | 1 | 1 | 1 |
| 40 | 9 | 10 | 1 | 1 | 1 | 1 |
| 52 | 5 | 14 | 1 | 1 | 0 | 0 |
| 37 | 4 | 15 | 1 | 1 | 1 | 1 |
| 52 | 5 | 15 | 1 | 1 | 1 | 1 |
| 50 | 6 | 15 | 1 | 1 | 0 | 1 |
| 74 | 5 |    |   |   | 1 | 1 |
| 43 | 5 |    | 0 | 1 | 0 | 0 |
| 60 | 5 |    | 0 | 1 | 0 | 0 |
| 35 | 5 |    | 0 | 1 | 0 | 0 |
| 36 | 5 |    | 0 | 1 | 0 | 1 |
|    |   |    | 0 | 0 | 0 | 1 |
| 32 | 7 |    | 1 | 1 | 1 | 1 |
| 58 | 6 | 5  | 1 | 1 | 0 |   |
| 74 | 5 | 2  | 0 | 1 | 0 | 0 |
| 46 | 5 | 3  | 1 | 1 | 0 | 1 |
| 64 | 6 | 3  | 0 | 0 | 0 | 1 |
| 66 | 5 | 5  | 0 | 1 | 0 | 1 |
| 47 | 7 | 8  | 1 | 1 | 0 | 1 |
| 55 | 4 | 1  | 1 | 1 | 0 | 1 |

|    |   |   |   |   |   |   |
|----|---|---|---|---|---|---|
| 45 | 5 | 1 | 0 | 1 | 0 | 0 |
| 57 | 6 | 3 | 0 | 1 | 0 | 1 |
| 38 | 6 | 2 | 1 | 1 | 0 | 0 |
| 69 | 5 | 2 | 0 | 1 | 0 | 1 |
| 32 | 6 | 3 | 0 | 1 | 0 | 0 |
| 46 | 3 | 4 | 0 | 1 | 0 | 0 |
| 70 | 4 | 4 | 1 | 1 | 0 | 0 |
| 45 | 5 | 4 | 1 | 1 | 0 | 1 |
| 47 | 7 | 5 | 1 | 1 | 0 | 1 |
| 41 | 7 | 6 | 1 | 1 | 0 | 1 |
| 34 | 6 | 7 | 1 | 1 | 0 | 1 |
| 46 | 7 | 7 | 1 | 1 | 1 | 1 |
| 50 | 9 | 7 | 1 | 1 | 1 | 1 |
| 38 | 5 |   | 0 | 1 | 0 | 0 |
| 58 | 4 |   |   |   | 0 | 1 |
| 62 | 6 | 3 | 1 | 1 | 0 | 1 |
| 46 | 5 | 4 | 1 | 1 | 1 | 1 |
| 46 | 6 | 6 | 1 | 1 | 1 | 1 |



| MMD | Party | CampaignPar | Math50 | Compliance | Trust | Reciprocity |
|-----|-------|-------------|--------|------------|-------|-------------|
| 1   | 3     | 3           | 1      | 1          | 0     | 0           |
| 0   | 4     | 4           | 0      | 0          | 1     | 0           |
| 0   | 1     | 4           | 0      | 0          | 1     | 0           |
| 0   | 5     | 11          | 0      | 0          | 1     | 0           |
|     | 10    | 10          | 1      | 0          | 1     | 0           |
| 0   | 4     | 4           | 1      | 1          | 1     | 0           |
| 1   | 3     | 3           | 1      | 1          | 1     | 0           |
| 1   | 3     | 3           | 1      | 1          | 1     | 0           |
| 0   | 4     | 4           | 1      | 1          | 1     | 0           |
| 1   | 3     | 3           | 1      | 1          | 1     | 0           |
| 1   | 3     | 3           | 1      | 1          | 1     | 0           |
| 1   | 3     | 3           | 1      | 1          | 1     | 0           |
| 1   | 3     | 3           | 1      | 1          | 1     | 0           |
| 0   | 4     | 4           | 1      | 1          | 1     | 0           |
| 1   | 3     | 3           | 1      | 1          | 1     | 0           |
| 0   | 6     | 11          | 1      | 1          | 1     | 0           |
| 1   | 3     | 3           | 1      | 1          | 1     | 0           |
| 0   | 4     | 4           | 1      | 1          | 1     | 0           |
| 0   | 4     | 4           | 1      | 1          | 1     | 0           |
| 0   | 6     | 11          | 1      | 1          | 1     | 0           |
| 0   | 6     | 10          | 1      | 1          | 1     | 0           |
| 0   | 4     | 3           | 1      | 1          | 1     | 0           |
| 0   | 5     | 11          | 1      | 1          | 1     | 0           |
| 0   | 4     | 11          | 1      | 1          | 1     | 0           |
| 0   | 4     | 4           | 1      | 1          | 1     | 0           |
| 1   | 3     | 10          | 0      | 1          | 1     | 0           |
| 1   | 3     | 11          | 0      | 1          | 1     | 0           |
| 0   | 6     | 11          | 1      | 1          | 0     | 1           |
| 0   | 5     | 3           | 0      | 1          | 0     | 1           |
| 0   | 6     | 11          | 1      | 0          | 1     | 1           |
| 0   | 5     | 11          | 1      | 0          | 1     | 1           |
| 1   | 3     | 3           | 0      | 0          | 1     | 1           |
| 0   | 6     | 11          | 1      | 0          | 1     | 1           |
| 0   | 4     | 3           | 1      | 0          | 1     | 1           |
| 0   | 6     | 11          | 1      | 0          | 1     | 1           |
| 1   | 3     | 3           | 1      | 0          | 1     | 1           |
| 0   | 4     | 3           | 1      | 0          | 1     | 1           |
| 0   | 4     | 4           | 1      | 0          | 1     | 1           |
| 0   | 6     | 11          | 1      | 1          | 1     | 1           |
| 1   | 3     | 3           | 1      | 1          | 1     | 1           |
| 0   | 0     | 10          | 0      | 1          | 1     | 1           |



|   |   |    |   |   |   |   |
|---|---|----|---|---|---|---|
| 1 | 3 | 3  | 1 | 1 | 1 | 1 |
| 1 | 3 | 3  | 1 | 1 | 1 | 1 |
| 1 | 3 | 3  | 1 | 1 | 1 | 1 |
| 1 | 3 | 4  | 1 | 1 | 1 | 1 |
| 1 | 3 | 3  | 1 | 1 | 1 | 1 |
| 0 | 4 | 4  | 1 | 1 | 1 | 1 |
| 0 | 2 | 3  | 1 | 1 | 1 | 1 |
| 0 | 4 | 4  | 1 | 1 | 1 | 1 |
| 1 | 3 | 3  | 1 | 1 | 1 | 1 |
| 0 | 4 | 4  | 1 | 1 | 1 | 1 |
| 0 | 4 | 4  | 1 | 1 | 1 | 1 |
| 0 | 6 | 11 | 1 | 1 | 1 | 1 |
| 1 | 3 | 3  | 1 | 1 | 1 | 1 |
| 0 | 4 | 4  | 1 | 1 | 1 | 1 |
| 0 | 0 | 10 | 1 | 1 | 1 | 1 |
| 0 | 6 | 11 | 1 | 1 | 1 | 1 |
| 0 | 5 | 11 | 1 | 1 | 1 | 1 |
| 1 | 3 | 3  | 1 | 1 | 1 | 1 |
| 0 | 6 | 11 | 1 | 1 | 1 | 1 |
| 1 | 3 | 3  | 1 | 1 | 1 | 1 |
| 1 | 3 | 3  | 1 | 1 | 1 | 1 |
| 0 | 0 | 10 | 1 | 1 | 1 | 1 |
| 1 | 3 | 3  | 1 | 1 | 1 | 1 |
| 1 | 3 | 3  | 1 | 1 | 1 | 1 |
| 0 | 0 | 10 | 0 | 1 | 1 | 1 |
| 0 | 5 | 11 | 1 | 1 | 1 | 1 |
| 1 | 3 | 3  | 1 | 1 | 1 | 1 |
| 1 | 3 | 3  | 1 | 1 | 1 | 1 |
| 0 | 6 | 11 | 1 | 1 | 1 | 1 |
| 1 | 3 | 3  | 1 | 1 | 1 | 1 |
| 1 | 3 | 3  | 0 | 1 | 1 | 1 |
| 1 | 3 | 3  | 1 | 1 | 1 | 1 |
| 1 | 3 | 3  | 1 | 1 | 1 | 1 |
| 4 | 4 | 4  | 0 | 1 | 1 | 1 |
| 0 | 6 | 11 | 1 | 1 | 1 | 1 |
| 1 | 3 | 3  | 1 | 0 | 1 | 0 |
| 0 | 5 | 11 | 1 | 1 | 1 | 0 |
| 0 | 4 | 4  | 1 | 1 | 1 | 0 |
| 1 | 3 | 3  | 1 | 1 | 1 | 0 |
| 0 | 5 | 4  | 1 | 1 | 1 | 0 |
| 0 | 4 | 4  | 1 | 1 | 1 | 0 |
| 0 | 6 | 11 | 0 | 0 | 1 | 1 |

|   |    |    |   |   |   |   |
|---|----|----|---|---|---|---|
| 1 | 3  | 3  | 1 | 0 | 1 | 1 |
| 0 | 6  | 11 | 0 | 0 | 1 | 1 |
| 1 | 3  | 3  | 1 | 1 | 1 | 1 |
| 1 | 3  | 3  | 1 | 1 | 1 | 1 |
| 1 | 3  | 3  | 1 | 1 | 1 | 1 |
| 0 | 5  | 11 | 1 | 1 | 1 | 1 |
| 1 | 3  | 3  | 1 | 1 | 1 | 1 |
| 1 | 3  | 3  | 1 | 1 | 1 | 1 |
| 0 | 4  | 4  | 1 | 1 | 1 | 1 |
| 0 | 6  | 10 | 0 | 1 | 1 | 1 |
| 0 | 4  | 10 | 1 | 1 | 1 | 1 |
| 1 | 3  | 3  | 1 | 1 | 1 | 1 |
| 0 | 0  | 10 | 1 | 1 | 1 | 1 |
| 0 | 10 | 10 | 1 | 1 | 1 | 0 |
| 1 | 3  | 3  | 1 | 0 | 1 | 1 |
| 0 | 4  | 4  | 0 | 1 | 1 | 1 |
| 1 | 3  | 3  | 1 | 1 | 1 | 1 |
| 1 | 3  | 3  | 1 | 1 | 1 | 1 |

| CompTrust | CompRecip | Farmer | Experience |
|-----------|-----------|--------|------------|
| 0         | 0         | 0      | 0          |
| 0         | 0         | 0      | 0          |
| 0         | 0         | 1      | 0          |
| 0         | 0         | 0      | 0          |
| 0         | 0         | 1      | 0          |
| 1         | 0         | 1      | 0          |
| 1         | 0         | 1      | 0          |
| 1         | 0         | 1      | 0          |
| 1         | 0         | 1      | 0          |
| 1         | 0         | 1      | 0          |
| 1         | 0         | 0      | 0          |
| 1         | 0         | 1      | 0          |
| 1         | 0         | 1      | 0          |
| 1         | 0         | 1      | 0          |
| 1         | 0         | 1      | 0          |
| 1         | 0         | 1      | 0          |
| 1         | 0         | 1      | 0          |
| 1         | 0         | 1      | 0          |
| 1         | 0         | 1      | 0          |
| 1         | 0         | 1      | 0          |
| 1         | 0         | 0      | 0          |
| 1         | 0         | 1      | 0          |
| 1         | 0         | 1      | 0          |
| 1         | 0         | 1      | 0          |
| 1         | 0         | 1      | 0          |
| 1         | 0         | 1      | 0          |
| 0         | 1         | 1      | 0          |
| 0         | 1         | 1      | 0          |
| 0         | 0         | 1      | 0          |
| 0         | 0         | 1      | 0          |
| 0         | 0         | 1      | 0          |
| 0         | 0         | 1      | 0          |
| 0         | 0         | 0      | 0          |
| 0         | 0         | 1      | 0          |
| 0         | 0         | 0      | 0          |
| 0         | 0         | 1      | 0          |
| 0         | 0         | 0      | 0          |
| 0         | 0         | 1      | 0          |
| 0         | 0         | 0      | 0          |
| 1         | 1         | 1      | 0          |
| 1         | 1         | 1      | 0          |
| 1         | 1         | 1      | 0          |

|   |   |   |   |
|---|---|---|---|
| 1 | 1 | 1 | 0 |
| 1 | 1 | 1 | 0 |
| 1 | 1 | 0 | 0 |
| 1 | 1 | 1 | 0 |
| 1 | 1 | 1 | 0 |
| 1 | 1 | 1 | 0 |
| 1 | 1 | 0 | 0 |
| 1 | 1 | 1 | 0 |
| 1 | 1 | 1 | 0 |
| 1 | 1 | 1 | 0 |
| 1 | 1 | 1 | 0 |
| 1 | 1 | 1 | 0 |
| 1 | 1 | 0 | 0 |
| 1 | 1 | 0 | 0 |
| 1 | 1 | 1 | 0 |
| 1 | 1 | 1 | 0 |
| 1 | 1 | 1 | 0 |
| 1 | 1 | 1 | 0 |
| 1 | 1 | 1 | 0 |
| 1 | 1 | 1 | 0 |
| 1 | 1 | 0 | 0 |
| 1 | 1 | 1 | 0 |
| 1 | 1 | 0 | 0 |
| 1 | 1 | 0 | 0 |
| 1 | 1 | 1 | 0 |
| 1 | 1 | 1 | 0 |
| 1 | 1 | 0 | 0 |
| 1 | 1 | 1 | 0 |
| 1 | 1 | 0 | 0 |
| 1 | 1 | 0 | 0 |



|   |   |   |   |
|---|---|---|---|
| 0 | 0 | 1 | 1 |
| 0 | 0 | 1 | 1 |
| 1 | 1 | 1 | 1 |
| 1 | 1 | 0 | 1 |
| 1 | 1 | 1 | 1 |
| 1 | 1 | 1 | 1 |
| 1 | 1 | 1 | 1 |
| 1 | 1 | 1 | 1 |
| 1 | 1 | 1 | 1 |
| 1 | 1 | 1 | 1 |
| 1 | 1 | 0 | 1 |
| 1 | 1 | 0 | 1 |
| 1 | 1 | 0 | 1 |
| 1 | 0 | 1 | 0 |
| 0 | 0 |   |   |
| 1 | 1 |   |   |
| 1 | 1 |   |   |
| 1 | 1 |   |   |
